# Supplementary material
Source: publisher site journal article supplement (https://www.spandidos-publications.com/3597/downloadSupplementary)

Figure S1. BS supplementation alleviates alcohol-induced lipid disorders in mice. (A) The serum TCH level. (B) The serum HDL-C level. (C) The serum LDL-C level.  $^{##}P<0.01$ . Ctrl, control; EtOH, ethyl alcohol; BS, *B. subtilis* supplementation; TCH, total cholesterol; HDL-C, high density lipoprotein cholesterol; LDL-C, low density lipoprotein cholesterol.

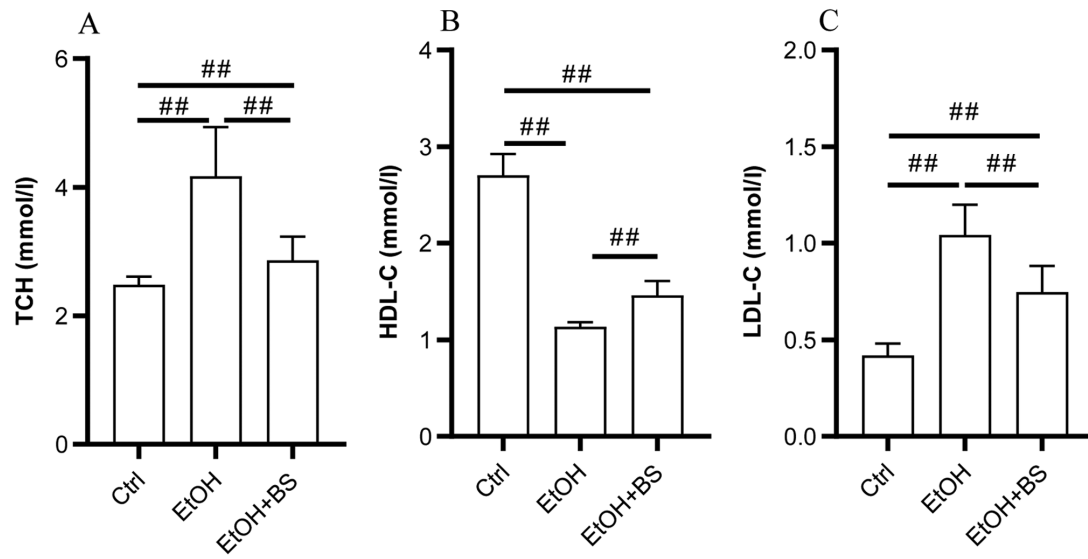

Figure S2. BS supplementation improves the reduced GSH level in liver tissues. The reduced GSH levels in liver tissues.  $##P<0.01$ . Ctrl, control; EtOH, ethyl alcohol; BS, *B. subtilis* supplementation; GSH, glutathione.

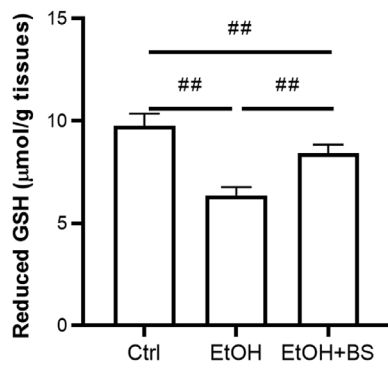

Supplement: Supplementary file 1 [file downloadSupplementary]
